# Supplementary material for: Fatigue limit of aluminum alloy V95pchAT2 in specimens with different design
Source: Royal Society of Chemistry journal article supplement (doi:10.1039/d3dt04038k), 1987-01-01
Supplement: d3dt04038k1.pdf [file d3dt04038k1.pdf]

**Hollow Ni<sub>3</sub>S<sub>4</sub>@Co<sub>3</sub>S<sub>4</sub> with core-satellite  
nanostructure derived from Metal-organic  
framework (MOF)-on-MOF hybrids as electrode  
material for supercapacitor**

Jiayi Xu, Hao Guo\*, Yanrui Hao, Jiaying Tian, Yinsheng Liu, Henglong Ren, Wu Yang\*

Key Lab of Eco-Environments Related Polymer Materials of MOE, Key Lab of  
Bioelectrochemistry and Environmental Analysis of Gansu Province, College of Chemistry and  
Chemical Engineering, Northwest Normal University, Gansu International Scientific and  
Technological Cooperation Base of Water-Retention Chemical Functional Materials, Lanzhou

730070, P R China

---

\* Correspondence authors. Email: [xbsfda123@126.com](mailto:xbsfda123@126.com) (W. Yang) and [haoguo12@126.com](mailto:haoguo12@126.com) (H. Guo).

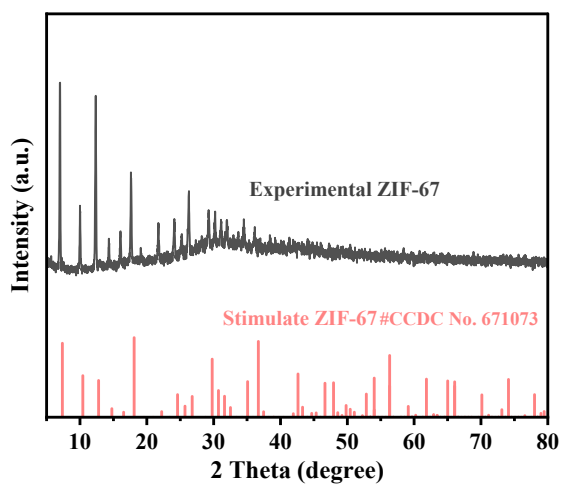

Figure S1 XRD patterns of ZIF-67.

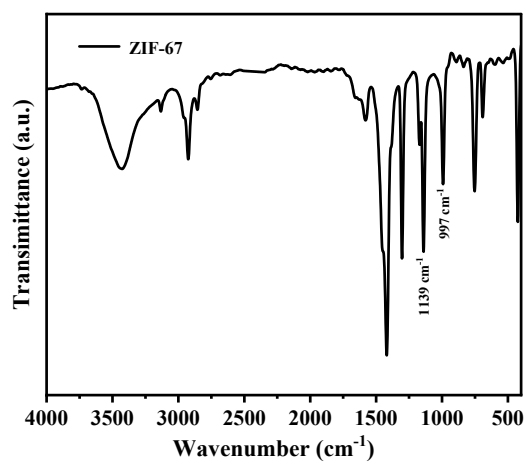

Figure S2 FT-IR spectra of ZIF-67.

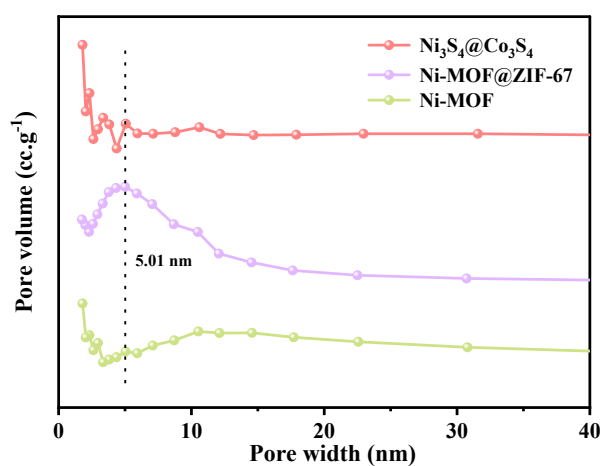

**Figure S3** BJH pore-size distribution curve Ni-MOF, Ni-MOF@ZIF-67 and Ni<sub>3</sub>S<sub>4</sub>@Co<sub>3</sub>S<sub>4</sub>.

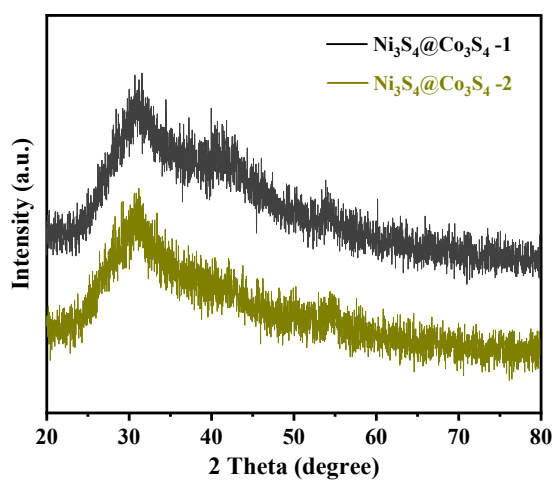

**Figure S4** XRD patterns of Ni<sub>3</sub>S<sub>4</sub>@Co<sub>3</sub>S<sub>4</sub>-1 and Ni<sub>3</sub>S<sub>4</sub>@Co<sub>3</sub>S<sub>4</sub>-2.

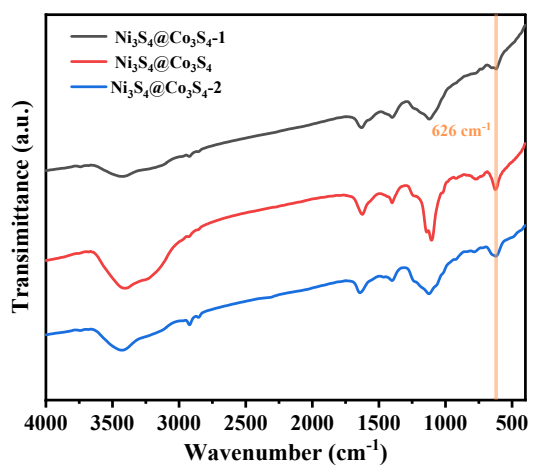

**Figure S5** FT-IR spectra of  $\text{Ni}_3\text{S}_4@\text{Co}_3\text{S}_4\text{-1}$ ,  $\text{Ni}_3\text{S}_4@\text{Co}_3\text{S}_4$  and  $\text{Ni}_3\text{S}_4@\text{Co}_3\text{S}_4\text{-2}$ .

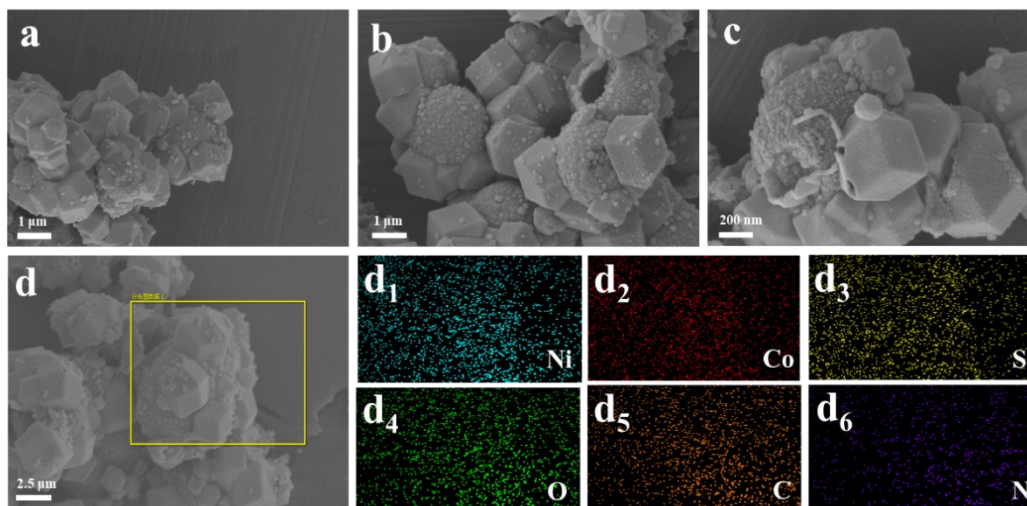

**Figure S6** (a-c) SEM images and (d<sub>1</sub>-d<sub>6</sub>) EDS elemental mapping images of  $\text{Ni}_3\text{S}_4@\text{Co}_3\text{S}_4\text{-1}$ .

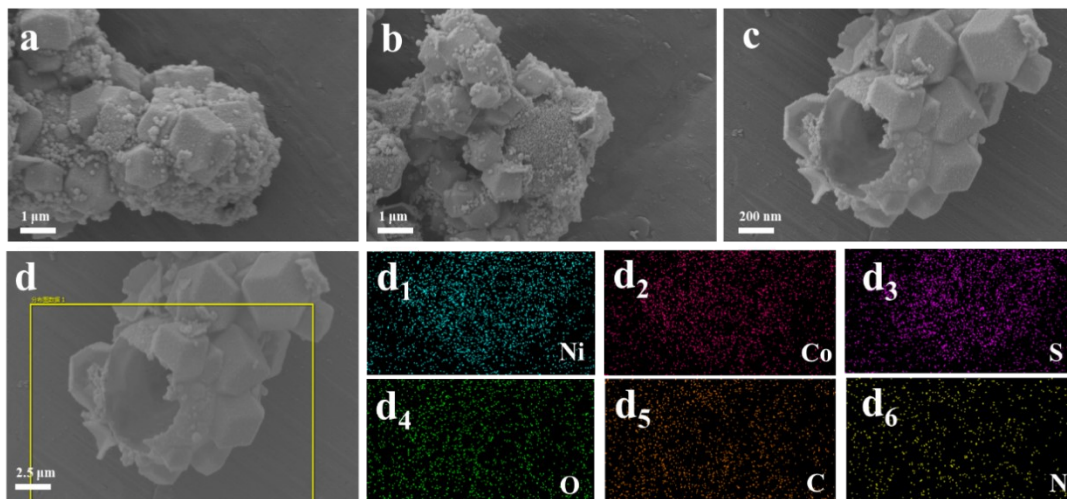

**Figure S7** (a-c) SEM images and (d<sub>1</sub>-d<sub>6</sub>) EDS elemental mapping images of Ni<sub>3</sub>S<sub>4</sub>@Co<sub>3</sub>S<sub>4</sub>-2.

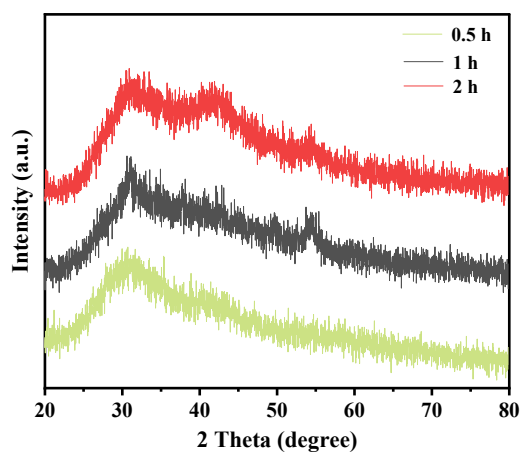

**Figure S8** XRD and FT-IR spectra of sulfurization 0.5h, 1h and 2h.

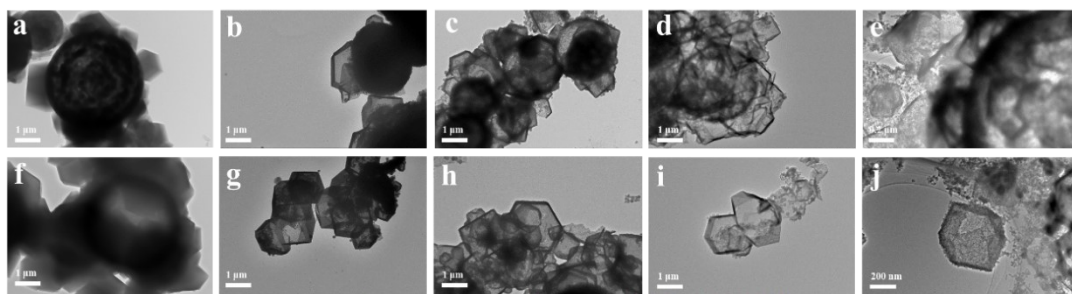

**Figure S9** TEM images of sulfidation time (a, f) 0 h, (b, g) 0.5 h, (c, h) 1h, (d, i) 2 h, (e, j) 4 h

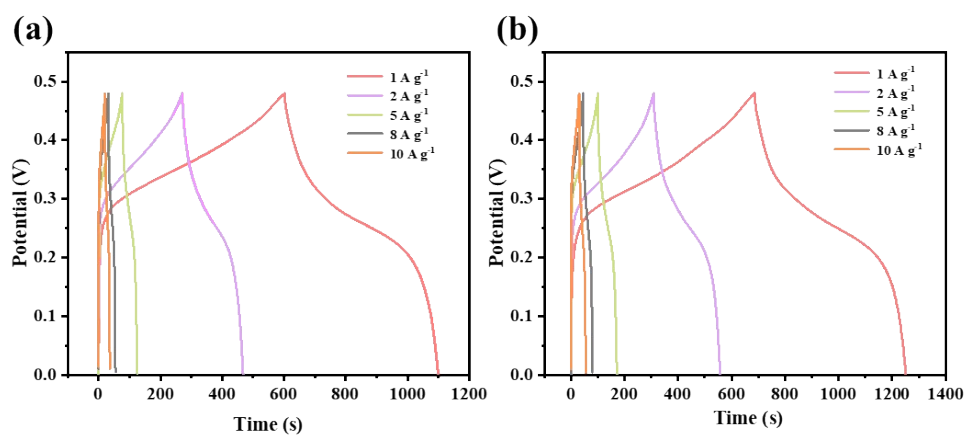

**Figure S10** (a)  $\text{Ni}_3\text{S}_4@\text{Co}_3\text{S}_4\text{-1}$  and (b)  $\text{Ni}_3\text{S}_4@\text{Co}_3\text{S}_4\text{-2}$  GCD curves from  $1 \text{ A g}^{-1}$  to  $10 \text{ A g}^{-1}$ .

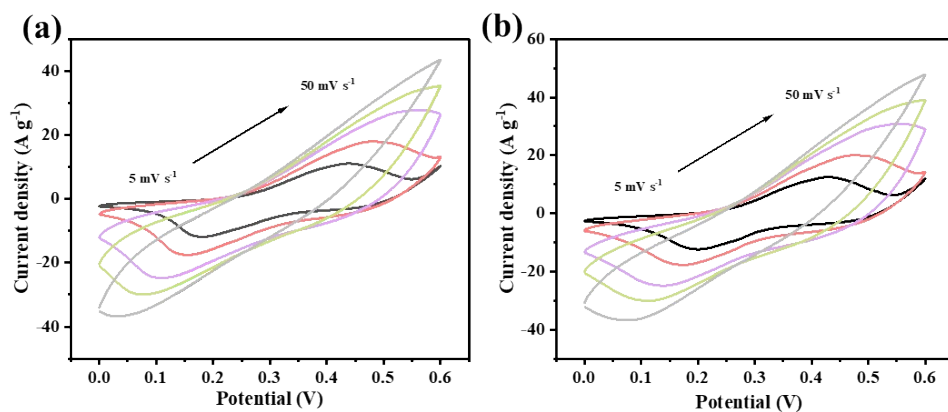

**Figure S11** (a)  $\text{Ni}_3\text{S}_4@\text{Co}_3\text{S}_4\text{-1}$  and (b)  $\text{Ni}_3\text{S}_4@\text{Co}_3\text{S}_4\text{-2}$  CV curves from 5 to 50  $\text{mV s}^{-1}$ .

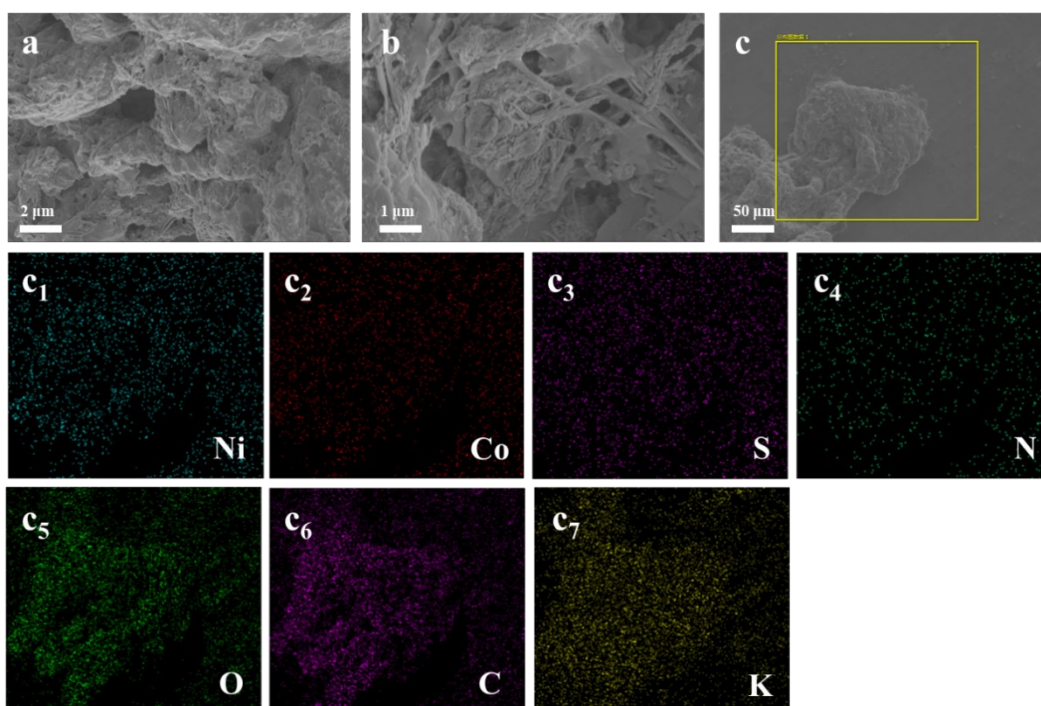

**Figure S12** (a-c) SEM images, (c<sub>1</sub>-c<sub>7</sub>) EDS elemental mapping pictures of  $\text{Ni}_3\text{S}_4@\text{Co}_3\text{S}_4$  after cycling.
